# Supplementary material for: A bi-functional three-terminal memristor applicable as an artificial synapse and neuron
Source: Royal Society of Chemistry journal article supplement (doi:10.1039/d3nr02780e), 2023-01-01
Supplement: d3nr02780e1.pdf [file d3nr02780e1.pdf]

## Supporting Information

### Bi-functional 3-Terminal Memristor Applicable as Artificial Synapse and Neuron

Lingli Liu,<sup>a</sup> Putu Andhita Dananjaya,<sup>a</sup> Calvin Ching Ian Ang,<sup>a</sup> Eng Kang Koh,<sup>a</sup> Gerard Joseph Lim,<sup>a</sup> Han Yin Poh,<sup>a</sup> Mun Yin Chee,<sup>a</sup> Calvin Xiu Xian Lee,<sup>a</sup> Wen Siang Lew<sup>a,\*</sup>

<sup>a</sup> School of Physical and Mathematical Sciences, Nanyang Technological University, 637371, Singapore.

Email: wensiang@ntu.edu.sg

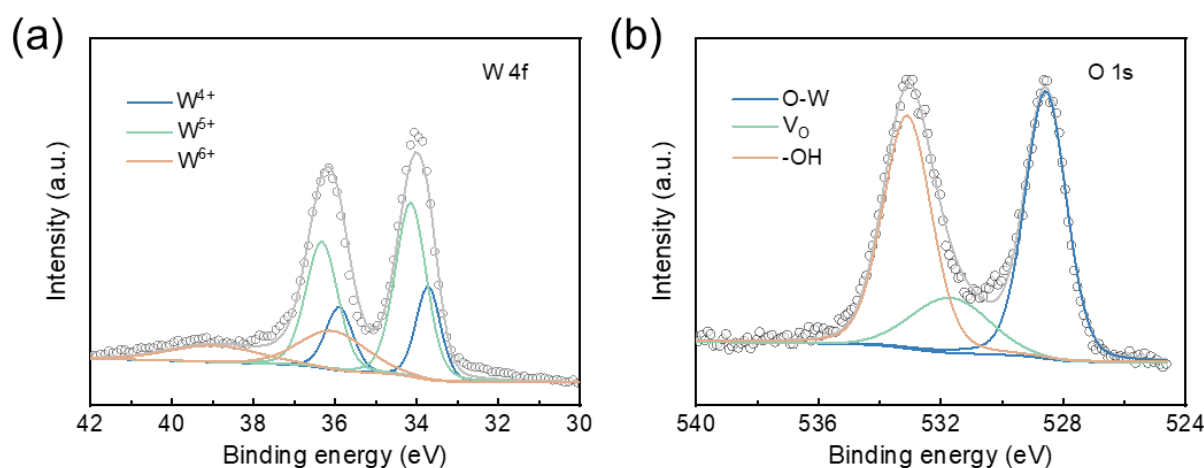

Figure S1. XPS spectra of (a) W 4f and (b) O 1s in WO<sub>x</sub> film.

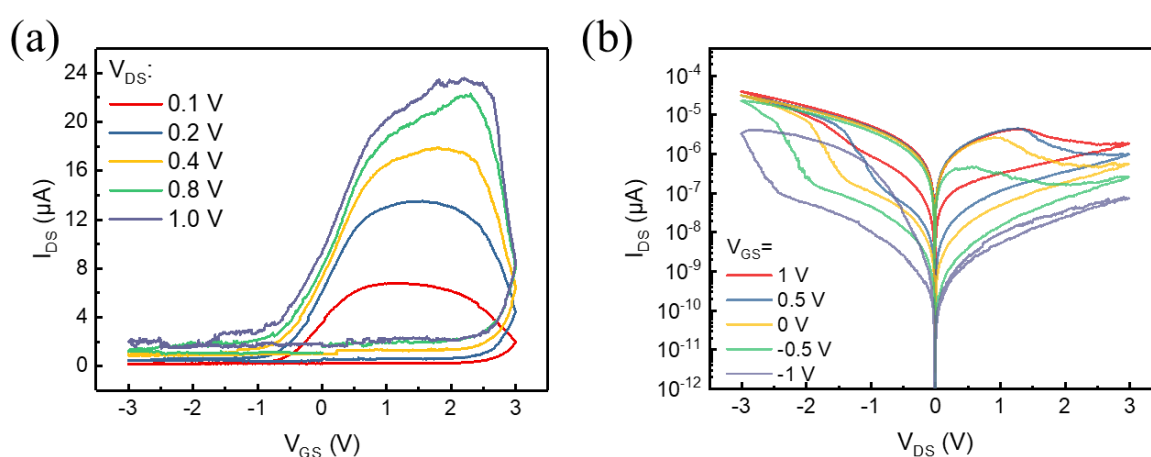

Figure S2. (a) Transfer characteristics under various V<sub>DS</sub>. (b) Output characteristics under different V<sub>GS</sub>.

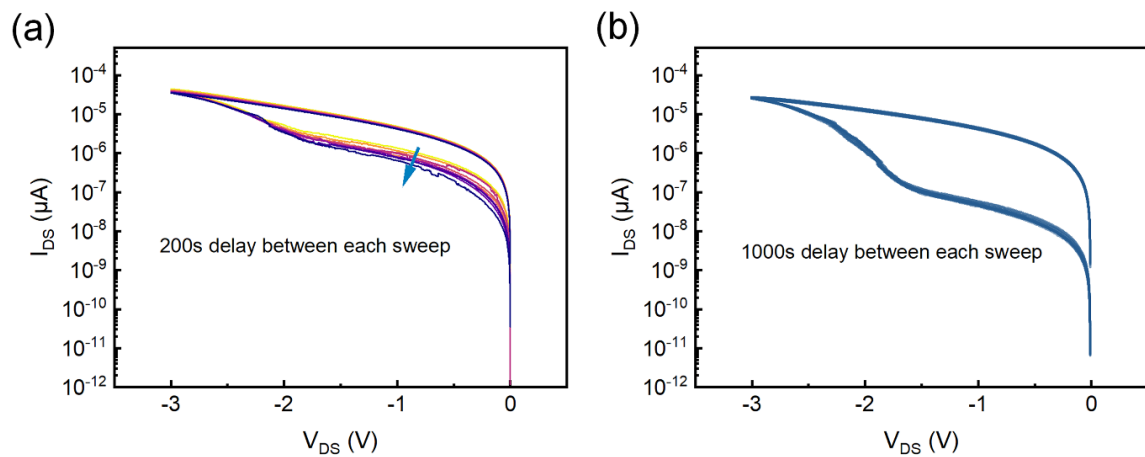

Figure S3.  $I_{DS}$  under negatively swept  $V_{DS}$  with (a) 200 s delay and (b) 1000 s delay between each sweep cycle.

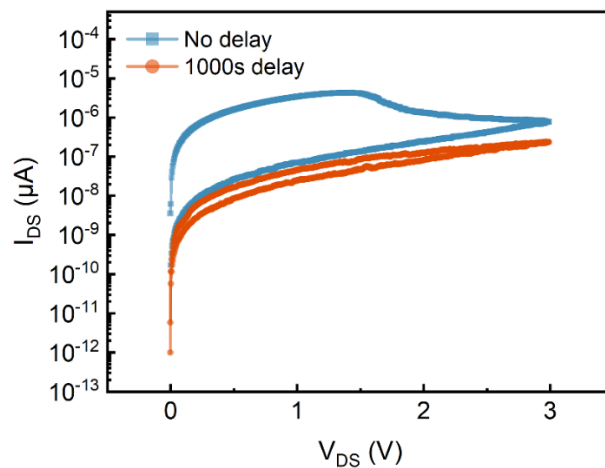

Figure S4.  $I_{DS}$  against positive  $V_{DS}$  with and without a delay of 1000 s delay after negative sweeping of  $V_{DS}$ .

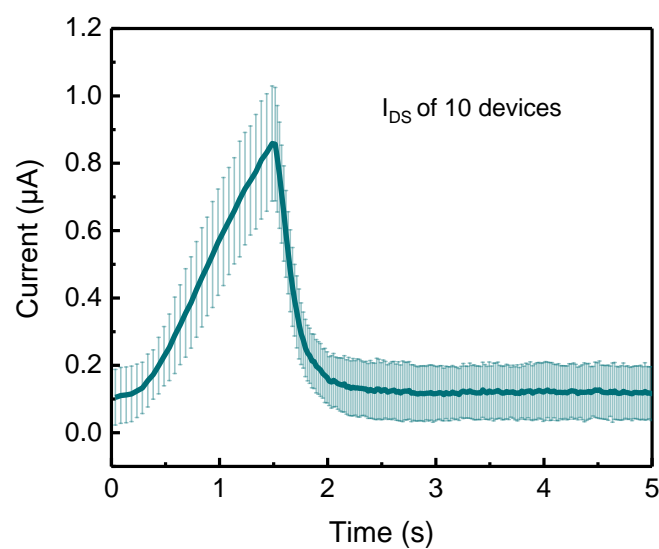

Figure S5.  $I_{DS}$  of 10 devices under the gate stimuli of 30 pulses (3 V, 50 ms). The solid line indicates the average value of the current, and the error bars are the respective standard deviation.

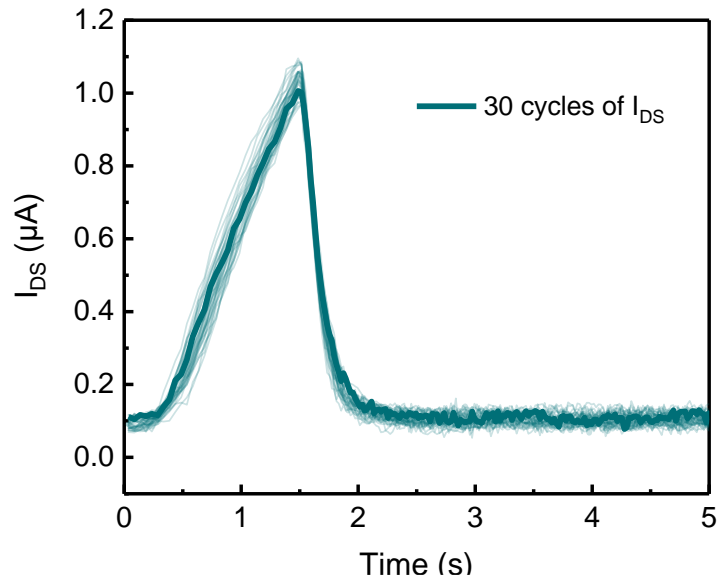

Figure S6. 30 cycles of  $I_{DS}$  under the gate stimuli of 30 pulses (3 V, 50 ms).

| Stack                                                                            | Mobile ion                             | Number of Terminal | Capacitor needed | CMOS compatibility | Ref.      |
|----------------------------------------------------------------------------------|----------------------------------------|--------------------|------------------|--------------------|-----------|
| V/VO <sub>x</sub> /HfWO <sub>x</sub> /Pt                                         | Oxygen vacancy                         | 2                  | Yes              | Yes                | 1         |
| Ta/Ag-NCs/Ta <sub>2</sub> O <sub>5</sub> /Pt/Ti                                  | Ag <sup>+</sup>                        | 2                  | No               | Yes                | 2         |
| Pd/NdNiO <sub>3</sub> /n-Si                                                      | Oxygen vacancy                         | 2                  | Yes              | Yes                | 3         |
| TiW/Ge <sub>2</sub> Sb <sub>2</sub> Te <sub>5</sub> /Ag :SiO <sub>2</sub> /Ag/Au | Ag <sup>+</sup><br>Phase change of GST | 2                  | Yes              | Yes                | 4         |
| TiN/Ti/HfO <sub>2</sub> /TiN                                                     | Oxygen vacancy                         | 2                  | Yes              | Yes                | 5         |
| Ag/2D Ti <sub>3</sub> C <sub>2</sub> T <sub>x</sub> -doped PVA/ ITO              | H <sup>+</sup>                         | 3                  | No               | No                 | 6         |
| Pt/HfO <sub>2</sub> /WO <sub>x</sub>                                             | O <sup>2-</sup>                        | 3                  | No               | Yes                | This work |

Table S1: Comparison of reported bi-functional devices.

## Reference

- 1 Y. Fu, Y. Zhou, X. Huang, B. Dong, F. Zhuge, Y. Li, Y. He, Y. Chai and X. Miao, *Adv Funct Mater*, 2022, **32**, 1–9.
- 2 J. Li, Y. Yang, M. Yin, X. Sun, L. Li and R. Huang, *Mater Horiz*, 2020, **7**, 71–81.
- 3 J. Zhao, Y. Ran, Y. Pei, Y. Wei and J. Sun, , DOI:10.1039/d3mh00835e.
- 4 S. H. Sung, T. J. Kim, H. Shin, T. H. Im and K. J. Lee, *Nat Commun*, 2022, **13**, 1–12.
- 5 J. Woo, D. Lee, Y. Koo and H. Hwang, *Microelectron Eng*, 2017, **182**, 42–45.
- 6 X. Zhang, S. Wu, R. Yu, E. Li, D. Liu, C. Gao, Y. Hu, T. Guo and H. Chen, *Matter*, 2022, **5**, 3023–3040.
